# Supplementary material
Source: publisher site journal article supplement (https://www.dovepress.com/article/313475)
Supplement: Supplementary file 1 [file get_supplementary_file.php]

**Supplement Table S1 Baseline characteristics of individuals with stable MHNW phenotype and individuals with MHO phenotype considering their transition in obese-metabolic status at the follow-up**

|  | **Stable MHNW** | **MHO-to-MHNW** | **Stable MHO** | **MHO-to-MUNW** | **MHO-to-MUO** | ***P*** |
| --- | --- | --- | --- | --- | --- | --- |
| N | 2030 | 137 | 828 | 15 | 254 |  |
| Men, % | 767 (37.8) | 58 (42.3) | 236 (28.5) | 5 (33.3) | 73 (28.7) | <0.001 |
| Age, years | 54.16 (8.81) | 53.73 (8.34) | 52.69 (8.07) | 49.93 (8.52) | 53.91 (8.03) | <0.001 |
| Married, % | 1926 (95.4) | 132 (96.4) | 777 (94.4) | 15 (100.0) | 239 (94.8) | 0.627 |
| Smoke, % |  |  |  |  |  |  |
| Never | 1375 (70.0) | 102 (77.3) | 644 (80.0) | 12 (85.7) | 190 (78.5) | <0.001 |
| Past | 117 (6.0) | 7 (5.3) | 40 (5.0) | 1 (7.1) | 11 (4.5) |  |
| Current | 472 (24.0) | 23 (17.4) | 121 (15.0) | 1 (7.1) | 41 (16.9) |  |
| Drinking, % |  |  |  |  |  |  |
| Never | 1454 (71.6) | 105 (76.6) | 632 (76.3) | 12 (80.0) | 183 (72.0) | 0.271 |
| Past | 86 (4.2) | 4 (2.9) | 35 (4.2) | 0 (0.0) | 9 (3.5) |  |
| Current | 490 (24.1) | 28 (20.4) | 161 (19.4) | 3 (20.0) | 62 (24.4) |  |
| Physical activity category, % |  |  |  |  |  |  |
| Low | 242 (14.4) | 18 (15.9) | 109 (15.2) | 3 (23.1) | 26 (12.1) | 0.76 |
| Moderate | 181 (10.8) | 16 (14.2) | 88 (12.3) | 1 (7.7) | 28 (13.1) |  |
| High | 1253 (74.8) | 79 (69.9) | 519 (72.5) | 9 (69.2) | 160 (74.8) |  |
| Sitting MET, minutes/week | 1020.00 [720.00,1320.00] | 1020.00 [720.00,1320.00] | 1320.00 [720.00,1320.00] | 1320.00 [1020.00,1620.00] | 1170.00 [720.00,1320.00] | 0.033 |
| Family history, % |  |  |  |  |  |  |
| Diabetes | 20 (1.1) | 1 (0.8) | 7 (1.0) | 0 (0.0) | 4 (1.9) | 0.833 |
| CVD | 104 (5.1) | 9 (6.6) | 57 (6.9) | 0 (0.0) | 14 (5.5) | 0.336 |
| Stroke | 87 (4.3) | 4 (2.9) | 36 (4.3) | 0 (0.0) | 18 (7.1) | 0.217 |
| Height, cm | 156.93 (7.19) | 156.57 (6.80) | 156.11 (7.02) | 156.79 (5.77) | 156.46 (7.28) | 0.09 |
| Weight, cm | 52.36 (5.95) | 62.01 (6.62) | 63.54 (7.06) | 65.77 (8.55) | 65.51 (8.13) | <0.001 |
| BMI, kg/m2 | 21.22 (1.41) | 25.25 (1.57) | 26.03 (1.77) | 26.86 (4.26) | 26.69 (2.04) | <0.001 |
| Waist, cm | 72.70 (5.80) | 77.98 (6.55) | 83.30 (5.96) | 80.63 (7.18) | 85.78 (6.26) | <0.001 |
| Hip, cm | 87.30 (4.65) | 90.99 (4.57) | 94.46 (5.21) | 91.90 (4.43) | 96.19 (6.00) | <0.001 |
| WHR | 0.83 (0.06) | 0.86 (0.07) | 0.88 (0.06) | 0.88 (0.06) | 0.89 (0.06) | <0.001 |
| SBP, mmHg | 133.51 (19.89) | 134.31 (22.77) | 135.48 (19.70) | 135.39 (23.81) | 141.26 (21.53) | <0.001 |
| DBP, mmHg | 77.28 (11.91) | 77.67 (12.65) | 79.81 (11.44) | 77.94 (16.50) | 82.23 (12.10) | <0.001 |
| FPG, mmol/L | 5.58 (0.52) | 5.61 (0.49) | 5.58 (0.48) | 5.53 (0.42) | 5.67 (0.51) | 0.119 |
| 2hPG, mmol/L | 6.54 (1.58) | 6.64 (1.60) | 6.77 (1.46) | 6.76 (1.97) | 6.79 (1.40) | 0.004 |
| HbA1c, % | 5.42 (0.41) | 5.47 (0.39) | 5.49 (0.40) | 5.56 (0.60) | 5.57 (0.45) | <0.001 |
| TG, mmol/L | 1.13 (0.67) | 1.29 (0.69) | 1.31 (0.68) | 1.51 (0.79) | 1.65 (0.93) | <0.001 |
| HDL, mmol/L | 1.82 (0.39) | 1.67 (0.33) | 1.63 (0.33) | 1.47 (0.41) | 1.54 (0.33) | <0.001 |
| LDL, mmol/L | 2.84 (0.78) | 2.95 (0.69) | 3.09 (0.80) | 3.05 (0.88) | 3.27 (0.82) | <0.001 |
| CHOL, mmol/L | 5.23 (0.93) | 5.23 (0.78) | 5.33 (0.94) | 5.20 (1.14) | 5.51 (0.96) | <0.001 |
| ALT, U/L | 17.02 (11.18) | 19.01 (16.01) | 19.43 (12.37) | 18.93 (9.09) | 20.91 (11.70) | <0.001 |
| AST, U/L | 26.20 (11.17) | 26.51 (12.45) | 25.11 (9.84) | 26.87 (8.15) | 25.97 (8.68) | 0.155 |
| GGT, U/L | 22.53 (29.49) | 27.98 (35.97) | 26.05 (23.88) | 31.40 (37.17) | 31.03 (32.15) | <0.001 |
| CreaC, μmol/L | 66.73 (11.37) | 67.75 (11.62) | 66.88 (13.42) | 68.29 (15.08) | 68.57 (15.98) | 0.215 |
| Fasting Insulin, mIU/L | 5.08 (2.84) | 6.33 (2.82) | 7.49 (3.21) | 6.09 (2.56) | 8.20 (3.51) | <0.001 |
| HOMA-IR | 1.27 (0.79) | 1.58 (0.73) | 1.87 (0.86) | 1.49 (0.61) | 2.07 (0.94) | <0.001 |
| FLI | 9.15 (7.61) | 21.94 (15.42) | 28.07 (16.01) | 30.58 (16.97) | 38.46 (17.24) | <0.001 |

Abbreviations: MET: metabolic equivalent of task; CVD: cardiovascular disease; BMI: body mass index; WHR: waist-hip ratio; SBP: systolic blood pressure; DBP: diastolic blood pressure; FLI: fatty liver index.

**Supplement Table S2 Risk for incident T2DM according to the BMI-metabolic status changes in 3-year follow-up using stable MHO or stable MUO as reference groups**

| **Baseline** | **Events/n at follow-up** | |  | **model 1** | **model 2** | **model 3** |
| --- | --- | --- | --- | --- | --- | --- |
| **MHO** | **MUO** |  | **OR (95% CI)** | **OR (95% CI)** | **OR (95% CI)** |
| **MHO** | 23/828 | - |  | 1 (ref) | 1 (ref) | 1 (ref) |
| **MHO** | - | 24/254 |  | 3.74 (2.07-6.77)*** | 3.21 (1.65-6.27)** | 3.13 (1.55-6.33)** |
| **MUO** | 74/345 | - |  | 1 (ref) | 1 (ref) | 1 (ref) |
| **MUO** | - | 8/197 |  | 0.15 (0.07-0.32)*** | 0.12 (0.04-0.31)*** | 0.12 (0.04-0.32)*** |

Model 1: Adjust for age and sex; Model 2: Model1 plus the adjustment for smoking, physical activity, sitting MET, and family history (diabetes, CVD, and stroke); Model 3: Model2 plus the adjustment for BMI, waist, and FPG.

** *P* < 0.01

*** *P* < 0.001
